# Supplementary material for: Type-specific concurrent anogenital HPV detection among young women and MSM attending Dutch sexual health clinics
Source: HighWire-hosted journal article supplement (doi:10.1136/sextrans-2022-055484), 2022-07-16
Supplement: sextrans-2022-055484supp002_data_supplement.pdf [file sextrans-2022-055484supp002_data_supplement.pdf]

## Women

### Included participants in concordance analysis:

- 1,492 women

### Included participants in risk factor analysis:

- 1,149 women with at least genital HPV infection

### Number of detected genital infection records in risk factor analysis:

- 2,677 type-specific infection records:
  - 1,622 genital-only
  - 1,055 concurrent
